# Supplementary material for: Historical and future anthropogenic warming effects on droughts, fires and fire emissions of CO 2 and PM 2.5 in equatorial Asia when 2015-like El Niño events occur
Source: Copernicus journal article supplement (doi:10.5194/esd-11-435-2020), 2020-05-15
Supplement: Supplementary file 1 [file esd-11-435-2020-supplement.pdf]

Supplement of Earth Syst. Dynam., 11, 435–445, 2020  
<https://doi.org/10.5194/esd-11-435-2020-supplement>  
© Author(s) 2020. This work is distributed under  
the Creative Commons Attribution 4.0 License.

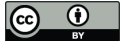

*Supplement of*

## **Historical and future anthropogenic warming effects on droughts, fires and fire emissions of CO<sub>2</sub> and PM<sub>2.5</sub> in equatorial Asia when 2015-like El Niño events occur**

**Hideo Shiogama et al.**

*Correspondence to:* Hideo Shiogama (shiogama.hideo@nies.go.jp)

The copyright of individual parts of the supplement might differ from the CC BY 4.0 License.

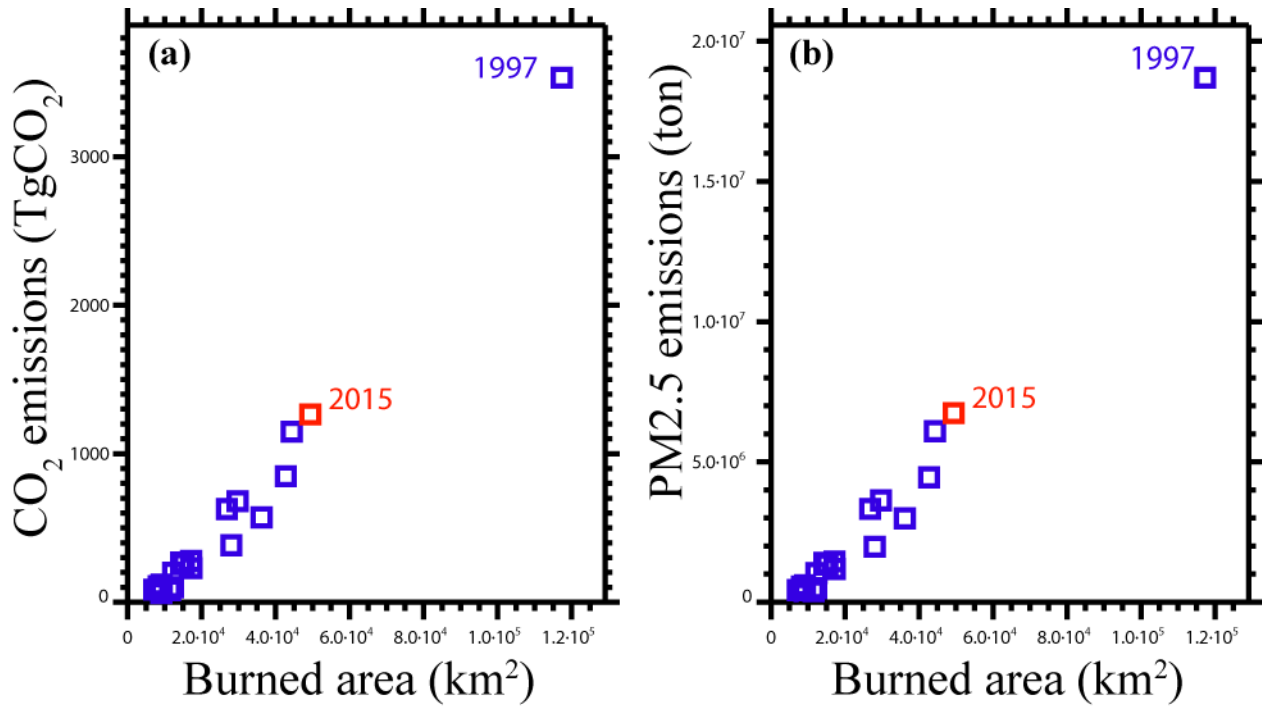

Supplementary Figure 1: Relationships between burned area and fire emissions in the EA area of the GFED4s during 1997-2016. The horizontal axes are burned areas (km<sup>2</sup>). The vertical axes denote (a) CO<sub>2</sub> emissions (TgCO<sub>2</sub>) and (b) PM<sub>2.5</sub> emissions (ton). The year 2015 values are indicated by red squares.

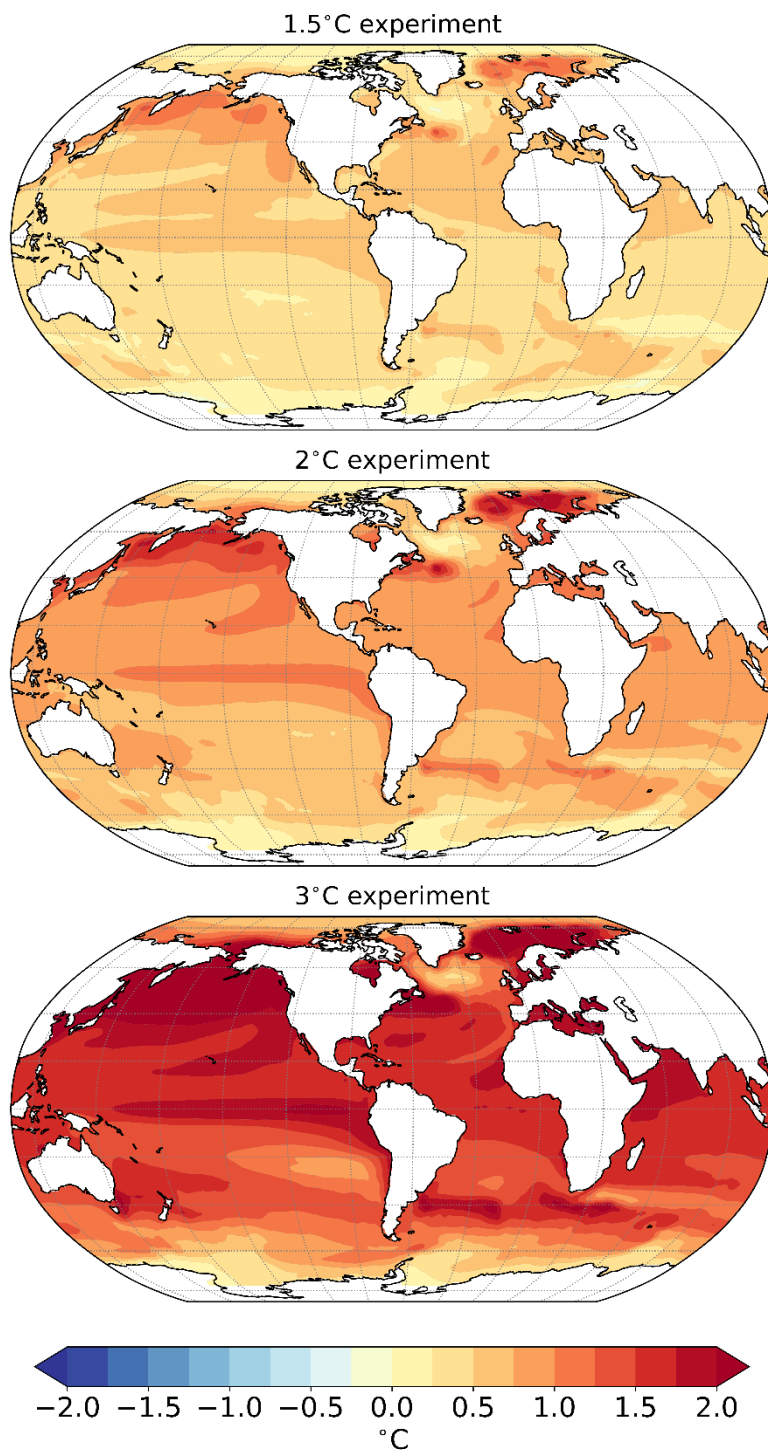

Supplementary Figure 2: The 2006-2015 mean SST differences (°C) between (top) 1.5 °C and Hist, (middle) 2.0 °C and Hist and (bottom) 3.0 °C and Hist.

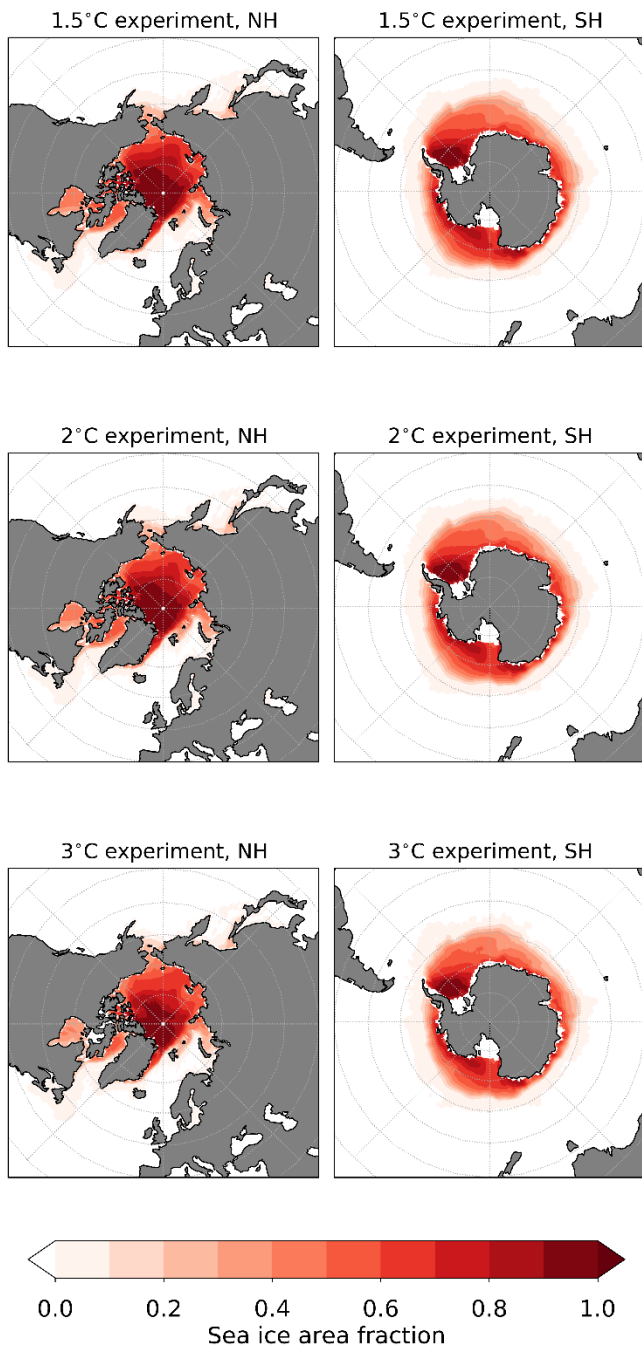

**Supplementary Figure 3: The 2006-2015 mean sea ice area fraction of (top) 1.5 °C, (middle) 2.0 °C and (bottom) 3.0 °C for (left and right) the Northern and Southern Hemispheres, respectively.**

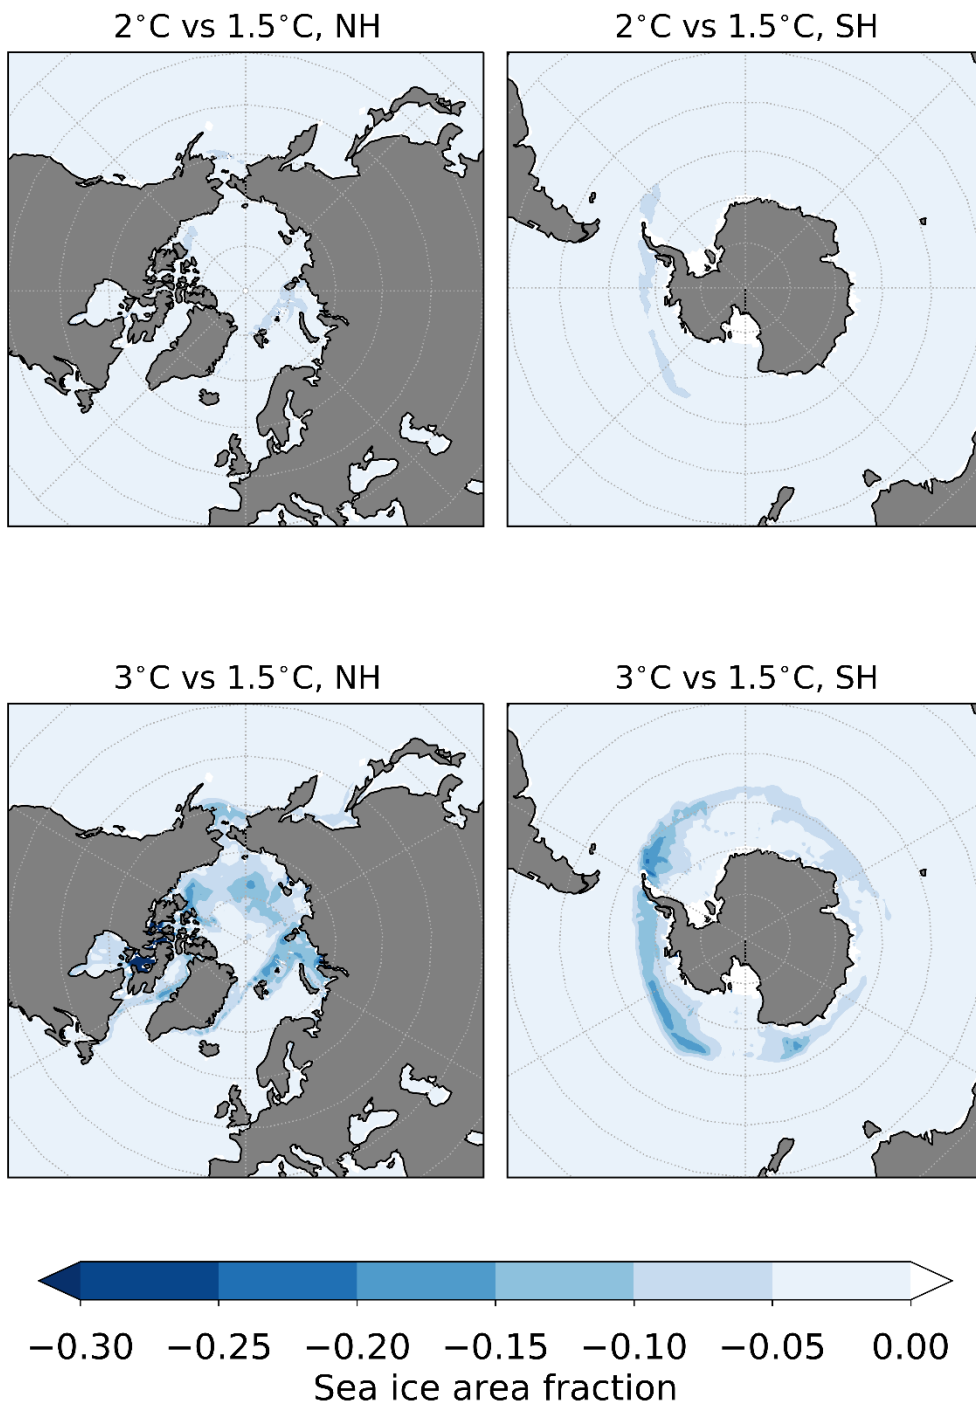

**Supplementary Figure 4: The sea ice area fraction differences between (top) 2.0°C and 1.5°C and (bottom) 3.0°C and 1.5°C for (left and right) the Northern and Southern Hemispheres, respectively.**
